# Supplementary material for: A Jasmonate ZIM-Domain Protein NaJAZd Regulates Floral Jasmonic Acid Levels and Counteracts Flower Abscission in Nicotiana attenuata Plants
Source: PubMed Central journal article supplement (PMC3585257; doi:10.1371/journal.pone.0057868), 2013-02-28
Supplement: pone.0057868.s008.pdf [file pone.0057868.s008.pdf]

**Table S1.** Up-regulated genes in irJAZd plants compared to WT plants determined by microarrays

| <b>Classification</b>                        | <b>Fold Change</b> | <b>Bincode (TAIR)</b> | <b>Annotation</b>                              | <b>Gene ID</b> | <b>ACC number</b> |
|----------------------------------------------|--------------------|-----------------------|------------------------------------------------|----------------|-------------------|
| <b>TCA / org. transformation.</b>            | 4.30               | 8.3                   | Carbonate dehydratase                          | Na_454_18630   | P27141            |
| <b>Miscellaneous enzyme families</b>         | 4.39               | 26.12                 | Peroxidase                                     | Na_454_32590   | Q9XIV8            |
| <b>RNA.regulation of transcription</b>       | 4.11               | 27.3.5                | ARR17 (ARABIDOPSIS RESPONSE REGULATOR 17)      | Na_454_26424   | NP_567037         |
|                                              | 3.49               | 27.3.99               | Leucine zipper factor-related                  | Na_454_15857   | NP_563798         |
| <b>DNA.synthesis/chromatin structure</b>     | 3.72               | 28.1.3                | Histone H1                                     | Na_454_08010   | AAC41651          |
| <b>Protein.targeting.nucleus</b>             | 3.02               | 29.3.1                | IMPORTIN ALPHA ISOFORM 2                       | Na_454_15992   | ABM05488          |
| <b>Protein.postranslational modification</b> | 3.05               | 29.4                  | Protein kinase                                 | Na_454_34744   | CAA50374          |
| <b>Signalling.receptor kinases</b>           | 3.50               | 30.2.26               | CCR1 (ARABIDOPSIS THALIANA CRINKLY4 RELATED 1) | Na_454_31246   | NP_187589         |

**Table S1.** (continued)

| Classification | Fold Change | Bincode (TAIR) | Annotation                               | Gene ID      | ACC number |
|----------------|-------------|----------------|------------------------------------------|--------------|------------|
| Not assigned   | 26.28       | 35.1           | Carbon-nitrogen hydrolase family protein | Na_454_20897 | NP_196765  |
|                | 4.85        | 35.1           | Carbon-nitrogen hydrolase family protein | Na_454_17587 | NP_196765  |
|                | 3.00        | 35.1           | Glycosyl transferase family 1 protein    | Na_454_37011 | NP_173105  |

\* Microarray data is processed by SAM after 75% percentile normalization (FDR=2.09).

\* Up-regulated genes were determined by a greater than 3-fold induction of normalized signals in their expression ratio (irJAZd / WT) of 2h-WOS treated leaves. The values are the average ratio of 3 biological replicates of the microarrays.

\* All changes in gene expression were statistically significant by t-test ( $P < 0.05$ )

\* Gene annotation is processed by Blast X (E-value  $< 1e-5$ )

\* Classification of genes is based on GO classification from TAIR (<http://www.arabidopsis.org>).
