# Supplementary material for: A Jasmonate ZIM-Domain Protein NaJAZd Regulates Floral Jasmonic Acid Levels and Counteracts Flower Abscission in Nicotiana attenuata Plants
Source: PubMed Central journal article supplement (PMC3585257; doi:10.1371/journal.pone.0057868), 2013-02-28
Supplement: pone.0057868.s009.pdf [file pone.0057868.s009.pdf]

**Table S2.** Down-regulated genes in irJAZd plants compared to WT plants determined by microarrays

| <b>Classification</b>        | <b>Fold Change</b> | <b>Bincode (TAIR)</b> | <b>Annotation</b>                                         | <b>Gene ID</b> | <b>ACC number</b> |
|------------------------------|--------------------|-----------------------|-----------------------------------------------------------|----------------|-------------------|
| <b>Major CHO metabolism</b>  | 3.86               | 2.2.1.1               | Fructokinase                                              | Na_454_06965   | NP_001234206      |
| <b>Minor CHO metabolism</b>  | 3.76               | 3.60                  | Putative beta-1,3-glucan synthase                         | Na_454_25961   | AAK49452          |
| <b>Glycolysis</b>            | 3.70               | 4.2.5                 | 6-phosphofructokinase 4                                   | Na_454_38726   | NP_001032120      |
| <b>Cell wall</b>             | 3.79               | 10.1.9                | UDP-glucose 4-epimerase                                   | Na_454_18676   | AAP42567          |
|                              | 3.28               | 10.5.2                | Proline-rich protein                                      | Na_454_40169   | AAF28387          |
| <b>Amino acid metabolism</b> | 5.02               | 13.1.3.1.1            | Asparagine synthetase 3                                   | Na_454_21256   | NP_001031864      |
|                              | 3.19               | 13.2.3.4              | S-adenosyl-L-homocysteine hydrolase                       | Na_454_21170   | AAV31754          |
| <b>Secondary metabolism</b>  | 4.17               | 16.8.3                | Glycosyltransferase                                       | Na_454_07441   | ADI33725          |
|                              | 2.99               | 16.4.1                | Iron ion binding / oxidoreductase/ oxidoreductase protein | Na_454_22715   | NP_190233         |
| <b>Hormone metabolism</b>    | 3.07               | 17.7.1.2              | Lipoxygenase (NaLOX1b)                                    | Na_454_37768   | AAP83135          |
| <b>Stress.abiotic</b>        | 3.67               | 20.2.1                | DnaJ-like protein isoform                                 | Na_454_21360   | ABI34703          |

**Table S2.** (continued)

| <b>Classification</b>                        | <b>Fold Change</b> | <b>Bincode (TAIR)</b> | <b>Annotation</b>                                          | <b>Gene ID</b> | <b>ACC number</b> |
|----------------------------------------------|--------------------|-----------------------|------------------------------------------------------------|----------------|-------------------|
| <b>Biodegradation of Xenobiotics</b>         | 3.37               | 24.10                 | Glyoxalase II 3                                            | Na_454_20653   | NP_564636         |
| <b>Miscellaneous enzyme families</b>         | 3.18               | 26.10                 | Cytochrome P450, family 78, subfamily A, polypeptide 10    | Na_454_31815   | NP_177551         |
| <b>RNA.regulation of transcription</b>       | 8.13               | 27.3.22               | Class 2 knotted1-like protein                              | Na_454_34641   | BAF95776          |
| <b>RNA.RNA binding</b>                       | 3.64               | 27.40                 | RNA recognition motif-containing protein                   | Na_454_41880   | NP_973888         |
| <b>Protein.synthesis</b>                     | 3.31               | 29.2.3                | Eukaryotic translation initiation factor SUI1-like protein | Na_454_11378   | NP_177291         |
| <b>Protein.postranslational modification</b> | 3.55               | 29.40                 | Protein kinase family protein-like                         | Na_454_17022   | BAD61275          |
|                                              | 3.48               | 29.40                 | O-methyltransferase                                        | Na_454_25230   | AAA34088          |
|                                              | 9.47               | 29.4.1                | Putative serine/threonine protein kinase                   | Na_454_15886   | AAC69450          |
|                                              | 3.28               | 29.4.1                | MAP kinase, putative                                       | Na_454_21759   | AAM20643          |
| <b>Protein.degradation</b>                   | 3.39               | 29.5.11.4.2           | RING/U-box domain-containing protein                       | Na_454_30344   | NP_175132         |
|                                              | 3.20               | 29.5.11.4.2           | E3 ubiquitin-protein ligase ATL41                          | Na_454_21141   | NP_181765         |
|                                              | 3.71               | 29.5.5                | Serine carboxypeptidase-like 16                            | Na_454_04811   | NP_566414         |
| <b>Signalling</b>                            | 3.95               | 30.1.1                | PAR-1c (photoassimilate-responsive 1c)                     | Na_454_25707   | CAA58732          |
|                                              | 3.30               | 30.11                 | Phytochrome F                                              | Na_454_38145   | AAC49301          |
|                                              | 2.96               | 30.2.99               | Leucine-rich repeat-containing protein                     | Na_454_03038   | NP_188563         |
|                                              | 4.25               | 30.30                 | Calcium-binding EF-hand domain-containing protein          | Na_454_06154   | NP_564623         |

**Table S2.** (continued)

| Classification            | Fold Change | Bincode (TAIR) | Annotation                                            | Gene ID      | ACC number   |
|---------------------------|-------------|----------------|-------------------------------------------------------|--------------|--------------|
| <b>Development</b>        | 5.36        | 33.99          | Nodulin MtN3 family protein                           | Na_454_41228 | NP_200131    |
|                           | 3.44        | 33.99          | NAC domain protein NAC2                               | Na_454_11638 | ABK96797     |
|                           | 3.06        | 33.30          | Squamosa promoter binding-like protein                | Na_454_11778 | ABH07904     |
| <b>Transporter.sugars</b> | 4.93        | 34.20          | Bidirectional sugar transporter SWEET3                | Na_454_16634 | XP_002267886 |
| <b>Not assigned</b>       | 11.02       | 35.20          | Protein LURP-one-related 5                            | Na_454_11287 | NP_178129    |
|                           | 9.35        | 35.20          | Jasmonate ZIM-domain protein 1                        | Na_454_02978 | BAG68655     |
|                           | 6.10        | 35.20          | Putative non-LTR retroelement reverse transcriptase   | Na_454_31619 | AAD26953     |
|                           | 4.65        | 35.20          | UDP-glycosyltransferase family protein                | Na_454_43115 | NP_001190226 |
|                           | 3.09        | 35.20          | Ninja-family protein AFP2                             | Na_454_29306 | NP_563933    |
|                           | 3.72        | 35.10          | Rho GTPase activation protein (RhoGAP) with PH domain | Na_454_36722 | NP_196776    |
|                           | 3.64        | 35.1.5         | Pentatricopeptide repeat-containing protein           | Na_454_25757 | XP_002273247 |

\* Microarray data is processed by SAM after 75% percentile normalization (FDR=2.09).

\* Down-regulated genes were determined by a greater than 3-fold repression of normalized signals in their expression ratio (irJAZd / WT) of 2h-WOS treated leaves. The values are the average ratio of 3 biological replicates of the microarrays.

\* All changes in gene expression were statistically significant by t-test ( $P < 0.05$ )

\* Gene annotation is processed by Blast X (E-value  $< 1e-5$ )

\* Classification of genes is based on GO classification from TAIR (<http://www.arabidopsis.org>).
