# Supplementary material for: A Jasmonate ZIM-Domain Protein NaJAZd Regulates Floral Jasmonic Acid Levels and Counteracts Flower Abscission in Nicotiana attenuata Plants
Source: PubMed Central journal article supplement (PMC3585257; doi:10.1371/journal.pone.0057868), 2013-02-28
Supplement: pone.0057868.s010.pdf [file pone.0057868.s010.pdf]

**Table S3.** Primer sequences used in quantitative real time PCR (qPCR)

| <b>Gene name</b> | <b>Primer sequence</b>       |
|------------------|------------------------------|
| NaJAZa FP        | CAGTGAAAGCTGAGCAATTCTAGTACTC |
| NaJAZa RP        | AGCCTTAGACGAATTGAATACCTACAC  |
| NaJAZb FP        | GGGAAAGCTAATTCAAGACAAATGG    |
| NaJAZb RP        | TGTATTCTTTAGCCACCAATCTAGC    |
| NaJAZc FP        | GGAAAGGGTGATGAACGCTGCA       |
| NaJAZc RP        | TATGGCAATAGGCTGCCTTCAGAC     |
| NaJAZd FP        | GAGATTGTAGATTCCGGCAAGGTCA    |
| NaJAZd RP        | TTCTCAGCTGAATCACCTGA         |
| NaJAZe FP        | CAATTTGGTCAAGGAGACGTGA       |
| NaJAZe RP        | GGCTCTGATCACAATTACAAGG       |
| NaJAZf FP        | CAAGTAGAGAAATGGAGGAG         |
| NaJAZf RP        | GCTAGTGATGATATGGAGAAG        |
| NaJAZh FP        | TTCTGCTACGCCGCAAGTACTG       |
| NaJAZh RP        | GGTATGGCGCTCTAGCCGTTG        |
| NaJAZj FP        | CATCATCACC AATTT CAGAGCCTTC  |
| NaJAZj RP        | TCCAATTTTCCAATTTCTCCCAGCA    |
| NaJAZk FP        | TCTATGGTGATGTGCCTGCTGAC      |
| NaJAZk RP        | AACGGATATCCAAGCTAGCTGTTG     |
| NaJAZl FP        | TTGCCAGAAGGAAATCCCTGAAGAG    |
| NaJAZl RP        | TCCATCAA AAGCTAGCCCTACTTAGC  |
| NaJAZm FP        | AGTGCGTCAAATTTGAGAGCACCA     |
| NaJAZm RP        | GCTGCTTGAATCCTCCTTTCTCTTC    |
| NaMYB305         | FP ATGCTAAGTGGGGAAACAG       |
| NaMYB305         | RP GCAATTGCATGGACCAGA        |
| NaNEC1 FP        | TGCTGTTTTTGCCGCTCCTT         |
| NaNEC1 RP        | ACCACATCGTGGCACAGAGAGT       |
| NaCHAL FP        | TTCACGTTTCAAGGCCCAA          |
| NaCHALRP         | TGCTCCATCAGCGAAAAGG          |
| NtEF1a FP        | CCCACTTCCCACATTGCTGTCA       |
| NtEF1a RP        | CGCATGTCCCTCACAGCAAAC        |
