# Supplementary material for: A Jasmonate ZIM-Domain Protein NaJAZd Regulates Floral Jasmonic Acid Levels and Counteracts Flower Abscission in Nicotiana attenuata Plants
Source: PubMed Central journal article supplement (PMC3585257; doi:10.1371/journal.pone.0057868), 2013-02-28
Supplement: pone.0057868.s011.pdf [file pone.0057868.s011.pdf]

**Table S4.** QC table showing technical variability of 30 selected control genes spotted in 10 different locations on microarray chips.

The expression values were normalized by 75 percentile and log 2 transformed before calculation average and SE of technical replicates.

| Gene ID                    | WT-1     | WT-2     | WT-3     | WT-4     | WT-5     | WT-6     |
|----------------------------|----------|----------|----------|----------|----------|----------|
| <b>Na_454_00153</b>        | 3.102678 | 5.228659 | 5.308914 | 5.49396  | 5.510409 | 5.452788 |
| Na_454_00153               | 5.430365 | 5.292221 | 5.357254 | 5.490642 | 5.550115 | 5.552954 |
| Na_454_00153               | 5.269469 | 5.25465  | 5.301848 | 5.484963 | 5.446494 | 5.490409 |
| Na_454_00153               | 4.916878 | 5.189664 | 5.322145 | 5.417511 | 5.428358 | 5.389279 |
| Na_454_00153               | 5.428364 | 5.318018 | 5.472222 | 5.606294 | 5.58202  | 5.659425 |
| Na_454_00153               | 5.463539 | 5.309923 | 5.455644 | 5.542436 | 5.565891 | 5.533057 |
| Na_454_00153               | 5.390505 | 5.354294 | 5.448306 | 5.488975 | 5.547724 | 5.567554 |
| Na_454_00153               | 5.476523 | 5.325844 | 5.480719 | 5.513835 | 5.584381 | 5.618717 |
| Na_454_00153               | 5.33067  | 5.331533 | 5.408558 | 5.486622 | 5.492589 | 5.523511 |
| Na_454_00153               | 5.411647 | 5.191409 | 5.295528 | 5.453557 | 5.456115 | 5.436405 |
| <b>Average</b>             |          |          | 5.258126 |          |          | 5.519293 |
| <b>Standard Error (SE)</b> |          |          | 0.07736  |          |          | 0.011677 |
| <b>Na_454_00163</b>        | 3.053905 | 2.30161  | 2.172045 | 2.866999 | 2.305365 | 2.440011 |
| Na_454_00163               | 3.110707 | 2.281886 | 2.075472 | 2.846393 | 2.287889 | 2.382794 |
| Na_454_00163               | 2.823222 | 2.258472 | 2.138299 | 2.895422 | 2.416752 | 2.474895 |
| Na_454_00163               | 3.008461 | 2.334496 | 2.163386 | 2.952028 | 2.430628 | 2.52776  |
| Na_454_00163               | 3.129168 | 2.314589 | 2.116558 | 2.841177 | 2.332064 | 2.497375 |
| Na_454_00163               | 3.155948 | 2.31619  | 2.10716  | 2.932141 | 2.394498 | 2.477966 |
| Na_454_00163               | 2.099214 | 2.385068 | 2.176239 | 2.923705 | 2.332651 | 2.525688 |
| Na_454_00163               | 3.113678 | 2.397269 | 2.170223 | 2.845356 | 2.363957 | 2.490758 |
| Na_454_00163               | 3.047987 | 2.298073 | 2.079237 | 2.882196 | 2.307956 | 2.530867 |
| Na_454_00163               | 3.014164 | 2.337978 | 2.123562 | 2.846731 | 2.349226 | 2.442611 |
| <b>Average</b>             |          |          | 2.467724 |          |          | 2.57427  |
| <b>Standard Error (SE)</b> |          |          | 0.073039 |          |          | 0.042813 |
| <b>Na_454_00262</b>        | 3.899846 | 3.73093  | 3.815086 | 3.793945 | 3.551883 | 3.652264 |
| Na_454_00262               | 3.992699 | 3.679946 | 3.871049 | 3.783207 | 3.60817  | 3.687914 |
| Na_454_00262               | 4.034709 | 3.878909 | 3.879799 | 3.856493 | 3.74462  | 3.826788 |
| Na_454_00262               | 3.904221 | 3.868207 | 3.956163 | 3.94011  | 3.726371 | 3.880254 |
| Na_454_00262               | 3.986818 | 3.83919  | 3.94133  | 3.888351 | 3.799067 | 3.848197 |
| Na_454_00262               | 4.120827 | 3.824172 | 3.930624 | 3.875133 | 3.756608 | 3.743249 |
| Na_454_00262               | 4.028203 | 3.79984  | 3.897945 | 3.906127 | 3.730101 | 3.937469 |
| Na_454_00262               | 3.910087 | 3.69151  | 3.84856  | 3.821731 | 3.487665 | 3.788116 |
| Na_454_00262               | 3.594781 | 3.736451 | 3.860198 | 3.836235 | 3.68536  | 3.800487 |
| Na_454_00262               | 3.306461 | 3.75324  | 3.872212 | 3.806136 | 3.661463 | 3.794204 |
| <b>Average</b>             |          |          | 3.871189 |          |          | 3.776145 |
| <b>Standard Error (SE)</b> |          |          | 0.027841 |          |          | 0.019738 |
| <b>Na_454_00266</b>        | 3.685713 | 3.719355 | 3.792743 | 3.685153 | 3.748467 | 3.529984 |
| Na_454_00266               | 3.567359 | 3.596745 | 3.649512 | 3.548218 | 3.655543 | 3.535064 |
| Na_454_00266               | 3.661725 | 3.642833 | 3.694071 | 3.565923 | 3.680516 | 3.520905 |
| Na_454_00266               | 3.614821 | 3.60198  | 3.641692 | 3.568416 | 3.616361 | 3.555893 |
| Na_454_00266               | 3.68889  | 3.605609 | 3.716483 | 3.526588 | 3.694692 | 3.568823 |
| Na_454_00266               | 3.666982 | 3.72079  | 3.736941 | 3.588186 | 3.673631 | 3.629661 |
| Na_454_00266               | 3.768677 | 3.597094 | 3.668749 | 3.676811 | 3.729046 | 3.624144 |

|                            |             |             |             |             |             |             |
|----------------------------|-------------|-------------|-------------|-------------|-------------|-------------|
| Na_454_00266               | 3.693249    | 3.64711     | 3.701041    | 3.651739    | 3.65495     | 3.60132     |
| Na_454_00266               | 3.000039    | 3.712908    | 3.792671    | 3.787051    | 3.790793    | 3.688733    |
| Na_454_00266               | 3.509887    | 3.535915    | 3.605654    | 3.551726    | 3.616813    | 3.561837    |
| <b>Average</b>             |             |             | 3.651325    |             |             | 3.633208    |
| <b>Standard Error (SE)</b> |             |             | 0.025448    |             |             | 0.014078    |
| <b>Gene ID</b>             | <b>WT-1</b> | <b>WT-2</b> | <b>WT-3</b> | <b>WT-4</b> | <b>WT-5</b> | <b>WT-6</b> |
| <b>Na_454_00283</b>        | 6.15586     | 5.987585    | 6.03658     | 6.038282    | 5.753025    | 5.909941    |
| Na_454_00283               | 6.159869    | 6.062705    | 6.183249    | 6.134803    | 5.948862    | 6.035026    |
| Na_454_00283               | 6.141579    | 6.048924    | 6.152547    | 6.060539    | 5.916054    | 6.074827    |
| Na_454_00283               | 6.297681    | 5.983136    | 6.091855    | 6.058118    | 5.957795    | 6.037959    |
| Na_454_00283               | 6.332432    | 5.943332    | 6.053139    | 6.023735    | 5.946969    | 5.975434    |
| Na_454_00283               | 6.473475    | 5.968147    | 6.091743    | 6.052683    | 6.031797    | 5.951704    |
| Na_454_00283               | 6.305056    | 5.990674    | 6.129752    | 6.029588    | 5.941688    | 6.001703    |
| Na_454_00283               | 6.059835    | 5.776007    | 5.851518    | 5.893396    | 5.809078    | 5.827014    |
| Na_454_00283               | 5.666056    | 5.957224    | 6.106958    | 6.061157    | 5.883002    | 5.970551    |
| Na_454_00283               | 6.051437    | 5.821326    | 5.909281    | 5.852762    | 5.79571     | 5.755533    |
| <b>Average</b>             |             |             | 6.07433     |             |             | 5.97499     |
| <b>Standard Error (SE)</b> |             |             | 0.030864    |             |             | 0.018421    |
| <b>Na_454_00339</b>        | 3.174038    | 3.182305    | 3.133584    | 2.978966    | 3.67459     | 3.00232     |
| Na_454_00339               | 3.080644    | 3.0013      | 3.023766    | 2.924529    | 3.613722    | 2.912544    |
| Na_454_00339               | 3.148295    | 3.084623    | 3.087538    | 2.996975    | 3.642317    | 2.882724    |
| Na_454_00339               | 3.129536    | 3.113567    | 3.11513     | 2.945871    | 3.73888     | 2.893432    |
| Na_454_00339               | 3.120714    | 3.108026    | 3.153317    | 2.965508    | 3.746549    | 2.955777    |
| Na_454_00339               | 3.108352    | 3.039104    | 3.107209    | 2.962883    | 3.729468    | 2.925756    |
| Na_454_00339               | 3.040867    | 3.094054    | 3.218249    | 3.032304    | 3.755566    | 3.043778    |
| Na_454_00339               | 3.230226    | 3.109968    | 3.160601    | 3.022088    | 3.739735    | 2.93085     |
| Na_454_00339               | 3.101818    | 3.084814    | 3.073078    | 3.018594    | 3.679108    | 3.046344    |
| Na_454_00339               | 3.02894     | 3.004016    | 3.029776    | 2.951918    | 3.657354    | 2.912456    |
| <b>Average</b>             |             |             | 3.112027    |             |             | 3.213377    |
| <b>Standard Error (SE)</b> |             |             | 0.010647    |             |             | 0.064753    |
| <b>Na_454_00535</b>        | 4.281607    | 4.248144    | 3.945429    | 3.451869    | 3.665608    | 3.185161    |
| Na_454_00535               | 4.168159    | 4.15134     | 3.891577    | 3.459607    | 3.668149    | 3.138147    |
| Na_454_00535               | 4.092443    | 4.218219    | 3.942518    | 3.506567    | 3.684138    | 3.207264    |
| Na_454_00535               | 4.187484    | 4.222936    | 3.907002    | 3.46879     | 3.609174    | 3.254287    |
| Na_454_00535               | 4.23802     | 4.301236    | 4.034722    | 3.604563    | 3.804762    | 3.377464    |
| Na_454_00535               | 4.176595    | 4.230007    | 3.952554    | 3.48177     | 3.73562     | 3.198989    |
| Na_454_00535               | 4.239693    | 4.327848    | 4.109713    | 3.597071    | 3.712591    | 3.18303     |
| Na_454_00535               | 4.263595    | 4.199302    | 3.948748    | 3.546799    | 3.709561    | 3.234582    |
| Na_454_00535               | 4.169097    | 4.154273    | 3.887975    | 3.439       | 3.648739    | 3.251638    |
| Na_454_00535               | 4.075606    | 4.103829    | 3.81862     | 3.365775    | 3.587223    | 3.104061    |
| <b>Average</b>             |             |             | 4.129268    |             |             | 3.474998    |
| <b>Standard Error (SE)</b> |             |             | 0.026091    |             |             | 0.037872    |
| <b>Na_454_00581</b>        | 7.096967    | 7.056708    | 7.211167    | 7.195171    | 7.015729    | 7.023168    |
| Na_454_00581               | 6.567686    | 7.03442     | 7.210718    | 7.170819    | 7.114703    | 7.133321    |
| Na_454_00581               | 7.247494    | 7.19532     | 7.364031    | 7.229319    | 7.123629    | 7.020622    |
| Na_454_00581               | 6.956748    | 7.156795    | 7.361076    | 7.280362    | 7.211714    | 7.160087    |
| Na_454_00581               | 6.661389    | 7.157372    | 7.400894    | 7.304877    | 7.104548    | 7.125672    |
| Na_454_00581               | 7.063823    | 7.070447    | 7.285451    | 7.173761    | 7.092336    | 7.014684    |
| Na_454_00581               | 7.115857    | 6.972707    | 7.211634    | 7.221645    | 7.019628    | 7.078234    |
| Na_454_00581               | 7.082802    | 7.034516    | 7.291615    | 7.176515    | 7.127022    | 7.087216    |

|                            |          |          |          |          |          |          |
|----------------------------|----------|----------|----------|----------|----------|----------|
| Na_454_00581               | 7.021893 | 6.9349   | 7.213302 | 7.052899 | 7.048958 | 6.987499 |
| Na_454_00581               | 7.154595 | 6.935175 | 7.226662 | 7.079099 | 7.076919 | 6.968235 |
| <b>Average</b>             |          |          | 7.110286 |          |          | 7.122005 |
| <b>Standard Error (SE)</b> |          |          | 0.033718 |          |          | 0.015702 |

| Gene ID                    | WT-1     | WT-2     | WT-3     | WT-4     | WT-5     | WT-6     |
|----------------------------|----------|----------|----------|----------|----------|----------|
| <b>Na_454_01047</b>        | 2.460512 | 2.823668 | 2.568578 | 2.40663  | 3.220239 | 2.298596 |
| Na_454_01047               | 2.789143 | 2.798069 | 2.534196 | 2.4494   | 3.219415 | 2.342726 |
| Na_454_01047               | 2.248332 | 2.822839 | 2.645724 | 2.49494  | 3.284437 | 2.426699 |
| Na_454_01047               | 2.438708 | 2.812611 | 2.592268 | 2.39672  | 3.17658  | 2.289633 |
| Na_454_01047               | 2.696269 | 2.793867 | 2.572603 | 2.446213 | 3.214271 | 2.351523 |
| Na_454_01047               | 2.33276  | 2.850079 | 2.604688 | 2.565196 | 3.293225 | 2.408673 |
| Na_454_01047               | 2.542775 | 2.818638 | 2.617767 | 2.440171 | 3.220189 | 2.436377 |
| Na_454_01047               | 2.847686 | 2.799234 | 2.591878 | 2.40957  | 3.239919 | 2.324778 |
| Na_454_01047               | 2.759175 | 2.855571 | 2.59303  | 2.396716 | 3.201236 | 2.280341 |
| Na_454_01047               | 2.82215  | 2.841929 | 2.581069 | 2.416341 | 3.175982 | 2.332113 |
| <b>Average</b>             |          |          | 2.659654 |          |          | 2.675349 |
| <b>Standard Error (SE)</b> |          |          | 0.030108 |          |          | 0.073434 |
| <b>Na_454_01097</b>        | -2.52688 | -5.99075 | -3.54886 | -3.65025 | -4.25997 | -2.52725 |
| Na_454_01097               | -4.58409 | -5.51163 | -3.61002 | -3.13261 | -4.49203 | -2.61749 |
| Na_454_01097               | -3.61644 | -4.849   | -3.82902 | -3.79831 | -5.18559 | -2.59684 |
| Na_454_01097               | -2.36861 | -5.12189 | -3.67846 | -3.84085 | -4.37311 | -2.56056 |
| Na_454_01097               | -2.68259 | -4.51082 | -4.02692 | -3.97352 | -4.59792 | -2.58102 |
| Na_454_01097               | -3.84494 | -5.04624 | -3.88213 | -3.69674 | -4.79996 | -2.47507 |
| Na_454_01097               | -2.56002 | -5.52744 | -3.83009 | -4.17564 | -5.08184 | -2.81597 |
| Na_454_01097               | -2.58449 | -5.19882 | -4.42797 | -3.8809  | -5.75153 | -2.68225 |
| Na_454_01097               | -2.82381 | -6.19925 | -3.98502 | -3.68953 | -3.92567 | -2.65253 |
| Na_454_01097               | -4.56517 | -5.40575 | -3.62755 | -3.25496 | -5.23251 | -2.29452 |
| <b>Average</b>             |          |          | -4.08764 |          |          | -3.69685 |
| <b>Standard Error (SE)</b> |          |          | 0.195805 |          |          | 0.1785   |
| <b>Na_454_01146</b>        | 4.571673 | 4.143926 | 4.154258 | 4.526415 | 3.729228 | 4.656185 |
| Na_454_01146               | 4.534688 | 4.092646 | 4.143903 | 4.489918 | 3.822118 | 4.613841 |
| Na_454_01146               | 4.423543 | 4.164838 | 4.207499 | 4.436543 | 3.786963 | 4.592306 |
| Na_454_01146               | 4.636531 | 4.127133 | 4.20793  | 4.482807 | 3.8308   | 4.654004 |
| Na_454_01146               | 4.635077 | 4.180717 | 4.231483 | 4.456441 | 3.809004 | 4.580966 |
| Na_454_01146               | 4.643655 | 4.098947 | 4.177563 | 4.457651 | 3.814242 | 4.600925 |
| Na_454_01146               | 4.693457 | 4.14598  | 4.237289 | 4.526942 | 3.740854 | 4.648768 |
| Na_454_01146               | 3.524641 | 4.185071 | 4.239051 | 4.583367 | 3.777178 | 4.674045 |
| Na_454_01146               | 4.483551 | 4.261571 | 4.311828 | 4.459782 | 3.725859 | 4.541771 |
| Na_454_01146               | 4.352568 | 3.878053 | 4.102044 | 4.485846 | 3.696766 | 4.463381 |
| <b>Average</b>             |          |          | 4.276239 |          |          | 4.296997 |
| <b>Standard Error (SE)</b> |          |          | 0.044816 |          |          | 0.068843 |
| <b>Na_454_01281</b>        | -2.25168 | -2.66884 | -2.59232 | -2.414   | -3.06631 | -2.03691 |
| Na_454_01281               | -2.26808 | -2.58197 | -2.20681 | -2.67035 | -3.41827 | -2.18412 |
| Na_454_01281               | -2.23086 | -2.7474  | -2.89237 | -2.57928 | -3.45529 | -2.12667 |
| Na_454_01281               | -2.58187 | -2.8462  | -2.3937  | -2.51466 | -3.30986 | -2.00721 |
| Na_454_01281               | -2.06089 | -2.38963 | -2.68264 | -2.32881 | -3.34543 | -2.3582  |
| Na_454_01281               | -2.29065 | -2.69579 | -2.32553 | -2.48598 | -2.87309 | -2.15816 |
| Na_454_01281               | -1.98527 | -2.3126  | -2.7137  | -2.60603 | -3.21074 | -1.81528 |
| Na_454_01281               | -2.12513 | -2.69567 | -2.43993 | -2.48574 | -2.92737 | -2.10422 |

|                            |          |          |          |          |          |          |
|----------------------------|----------|----------|----------|----------|----------|----------|
| Na_454_01281               | -2.3266  | -3.18431 | -2.49758 | -2.41131 | -3.3154  | -2.3763  |
| Na_454_01281               | -3.21668 | -2.70157 | -2.5273  | -2.29156 | -3.11953 | -2.22982 |
| <b>Average</b>             |          |          | -2.48104 |          |          | -2.61426 |
| <b>Standard Error (SE)</b> |          |          | 0.054634 |          |          | 0.087483 |

| Gene ID                    | WT-1     | WT-2     | WT-3     | WT-4     | WT-5     | WT-6     |
|----------------------------|----------|----------|----------|----------|----------|----------|
| <b>Na_454_01409</b>        | 4.092009 | 3.704474 | 3.931586 | 3.567502 | 3.480359 | 3.505349 |
| Na_454_01409               | 4.249029 | 3.856073 | 4.124197 | 3.775984 | 3.682702 | 3.713344 |
| Na_454_01409               | 4.263742 | 3.830992 | 4.165333 | 3.750204 | 3.635446 | 3.698323 |
| Na_454_01409               | 4.18281  | 3.842846 | 4.105311 | 3.755281 | 3.618756 | 3.713832 |
| Na_454_01409               | 4.291477 | 3.862251 | 4.081456 | 3.779341 | 3.640211 | 3.713304 |
| Na_454_01409               | 4.029095 | 3.706907 | 4.045529 | 3.821015 | 3.597455 | 3.66819  |
| Na_454_01409               | 4.327555 | 3.775382 | 4.09946  | 3.7654   | 3.684239 | 3.591831 |
| Na_454_01409               | 4.397808 | 3.932399 | 4.213247 | 3.835678 | 3.711505 | 3.755025 |
| Na_454_01409               | 4.015012 | 3.756924 | 4.086043 | 3.721504 | 3.572092 | 3.694215 |
| Na_454_01409               | 4.095032 | 3.746023 | 4.005091 | 3.606945 | 3.449448 | 3.546457 |
| <b>Average</b>             |          |          | 4.035887 |          |          | 3.683263 |
| <b>Standard Error (SE)</b> |          |          | 0.035343 |          |          | 0.018014 |
| <b>Na_454_01487</b>        | 5.258248 | 5.431272 | 5.447902 | 5.330085 | 5.272129 | 5.252139 |
| Na_454_01487               | 5.437007 | 5.36252  | 5.445874 | 5.384118 | 5.218079 | 5.256125 |
| Na_454_01487               | 5.467107 | 5.486246 | 5.54071  | 5.459965 | 5.402191 | 5.327166 |
| Na_454_01487               | 5.451658 | 5.414402 | 5.521575 | 5.366114 | 5.276362 | 5.302348 |
| Na_454_01487               | 5.608027 | 5.46316  | 5.557732 | 5.437122 | 5.366622 | 5.258097 |
| Na_454_01487               | 5.306492 | 5.429015 | 5.551109 | 5.407357 | 5.352877 | 5.294707 |
| Na_454_01487               | 5.633737 | 5.420533 | 5.512573 | 5.409169 | 5.426275 | 5.326679 |
| Na_454_01487               | 5.299177 | 5.422491 | 5.480368 | 5.442231 | 5.5028   | 5.355873 |
| Na_454_01487               | 5.35329  | 5.567183 | 5.666029 | 5.459826 | 5.440139 | 5.20086  |
| Na_454_01487               | 5.377341 | 5.406601 | 5.424409 | 5.385984 | 5.366438 | 5.256891 |
| <b>Average</b>             |          |          | 5.464275 |          |          | 5.352869 |
| <b>Standard Error (SE)</b> |          |          | 0.017543 |          |          | 0.014533 |
| <b>Na_454_02132</b>        | 8.917799 | 8.784295 | 9.065522 | 8.846752 | 8.607615 | 8.791781 |
| Na_454_02132               | 8.597234 | 8.711393 | 8.96537  | 8.793462 | 8.588431 | 8.765886 |
| Na_454_02132               | 8.800393 | 8.785282 | 9.027667 | 8.873799 | 8.625196 | 8.758952 |
| Na_454_02132               | 8.79539  | 8.711356 | 8.940885 | 8.713621 | 8.502344 | 8.693181 |
| Na_454_02132               | 8.869356 | 8.734323 | 8.867989 | 8.741816 | 8.506238 | 8.738904 |
| Na_454_02132               | 8.830055 | 8.758948 | 8.976766 | 8.833866 | 8.590118 | 8.784296 |
| Na_454_02132               | 9.009479 | 8.728717 | 8.967468 | 8.801198 | 8.48605  | 8.774305 |
| Na_454_02132               | 8.837213 | 8.804757 | 8.981824 | 8.764246 | 8.504642 | 8.804533 |
| Na_454_02132               | 9.012829 | 8.842384 | 9.088994 | 8.879002 | 8.64042  | 8.794541 |
| Na_454_02132               | 8.885026 | 8.708488 | 8.993275 | 8.927462 | 8.589121 | 8.855801 |
| <b>Average</b>             |          |          | 8.867174 |          |          | 8.711304 |
| <b>Standard Error (SE)</b> |          |          | 0.022742 |          |          | 0.022918 |
| <b>Na_454_02256</b>        | 5.601254 | 5.710153 | 5.917463 | 5.256379 | 4.661053 | 5.732323 |
| Na_454_02256               | 5.40834  | 5.63682  | 5.888952 | 5.236946 | 4.684583 | 5.737542 |
| Na_454_02256               | 5.463979 | 5.642051 | 5.882238 | 5.230486 | 4.698211 | 5.740149 |
| Na_454_02256               | 4.523272 | 5.685784 | 5.890114 | 5.349827 | 4.669428 | 5.695332 |
| Na_454_02256               | 5.670411 | 5.740783 | 5.936194 | 5.332818 | 4.712194 | 5.827104 |
| Na_454_02256               | 4.55026  | 5.753787 | 5.934672 | 5.308732 | 4.673186 | 5.831124 |
| Na_454_02256               | 5.630233 | 5.72129  | 5.971382 | 5.347345 | 4.745552 | 5.843958 |
| Na_454_02256               | 5.800295 | 5.890774 | 6.053126 | 5.294044 | 4.758807 | 5.706878 |

|                            |          |          |          |          |          |          |
|----------------------------|----------|----------|----------|----------|----------|----------|
| Na_454_02256               | 5.716856 | 5.882675 | 5.941097 | 5.221236 | 4.669428 | 5.699362 |
| Na_454_02256               | 5.465024 | 5.781942 | 5.922608 | 5.270523 | 4.735358 | 5.771657 |
| <b>Average</b>             |          |          | 5.68312  |          |          | 5.246816 |
| <b>Standard Error (SE)</b> |          |          | 0.064164 |          |          | 0.080775 |

| Gene ID                    | WT-1     | WT-2     | WT-3     | WT-4     | WT-5     | WT-6     |
|----------------------------|----------|----------|----------|----------|----------|----------|
| <b>Na_454_02680</b>        | 2.293291 | 2.233609 | 2.33469  | 2.225906 | 1.979177 | 2.023656 |
| Na_454_02680               | 2.349614 | 2.135339 | 2.297692 | 2.189506 | 2.1006   | 2.125415 |
| Na_454_02680               | 2.231426 | 2.239141 | 2.319298 | 2.165045 | 2.029161 | 2.141163 |
| Na_454_02680               | 2.34267  | 2.373213 | 2.444317 | 2.426778 | 2.178529 | 2.313691 |
| Na_454_02680               | 2.246356 | 2.284547 | 2.406147 | 2.254128 | 2.101432 | 2.164482 |
| Na_454_02680               | 2.267329 | 2.282746 | 2.419923 | 2.322418 | 2.111842 | 2.183733 |
| Na_454_02680               | 2.514714 | 2.342395 | 2.38753  | 2.268776 | 2.085528 | 2.206723 |
| Na_454_02680               | 2.411568 | 2.305522 | 2.389296 | 2.246056 | 2.060738 | 2.202111 |
| Na_454_02680               | 2.455883 | 2.330796 | 2.375307 | 2.246573 | 2.059011 | 2.199495 |
| Na_454_02680               | 2.514216 | 2.391615 | 2.50176  | 2.190028 | 2.105398 | 2.204047 |
| <b>Average</b>             |          |          | 2.333865 |          |          | 2.170803 |
| <b>Standard Error (SE)</b> |          |          | 0.016494 |          |          | 0.017807 |
| <b>Na_454_03241</b>        | 5.672851 | 5.411571 | 5.626818 | 5.459555 | 5.279876 | 5.483634 |
| Na_454_03241               | 5.765325 | 5.518574 | 5.755397 | 5.645014 | 5.360744 | 5.42552  |
| Na_454_03241               | 5.709061 | 5.478278 | 5.751555 | 5.631449 | 5.394102 | 5.531151 |
| Na_454_03241               | 5.687073 | 5.40763  | 5.634643 | 5.504594 | 5.300552 | 5.471008 |
| Na_454_03241               | 5.683344 | 5.417931 | 5.706102 | 5.578046 | 5.360707 | 5.523514 |
| Na_454_03241               | 5.6835   | 5.418494 | 5.680231 | 5.586759 | 5.375073 | 5.603659 |
| Na_454_03241               | 5.717656 | 5.487061 | 5.732662 | 5.527889 | 5.398035 | 5.528451 |
| Na_454_03241               | 5.386378 | 5.339992 | 5.587082 | 5.465181 | 5.416767 | 5.426993 |
| Na_454_03241               | 5.45135  | 5.274641 | 5.454297 | 5.289161 | 5.171925 | 5.318979 |
| Na_454_03241               | 5.574295 | 5.313988 | 5.65447  | 5.501085 | 5.257223 | 5.34962  |
| <b>Average</b>             |          |          | 5.571833 |          |          | 5.446605 |
| <b>Standard Error (SE)</b> |          |          | 0.027344 |          |          | 0.021606 |
| <b>Na_454_03693</b>        | 8.171557 | 8.939418 | 9.071892 | 8.954336 | 8.804364 | 9.039117 |
| Na_454_03693               | 9.009503 | 8.959006 | 8.995144 | 8.868822 | 8.746171 | 8.870007 |
| Na_454_03693               | 8.084452 | 8.97536  | 9.11396  | 8.948736 | 8.72032  | 8.926068 |
| Na_454_03693               | 7.601394 | 8.953937 | 9.075366 | 8.903094 | 8.790295 | 8.881303 |
| Na_454_03693               | 8.83071  | 8.87411  | 8.95588  | 8.869667 | 8.776174 | 8.809448 |
| Na_454_03693               | 9.019256 | 8.914575 | 8.972596 | 8.921963 | 8.701422 | 8.854384 |
| Na_454_03693               | 9.099228 | 8.962503 | 9.037519 | 8.857024 | 8.740127 | 8.829    |
| Na_454_03693               | 9.033515 | 8.927    | 9.063487 | 8.891917 | 8.741186 | 8.867539 |
| Na_454_03693               | 8.029856 | 8.902432 | 9.019191 | 8.977558 | 8.769775 | 8.912087 |
| Na_454_03693               | 9.005658 | 8.895368 | 9.012777 | 8.931266 | 8.803107 | 8.954227 |
| <b>Average</b>             |          |          | 8.836772 |          |          | 8.850811 |
| <b>Standard Error (SE)</b> |          |          | 0.066781 |          |          | 0.015409 |
| <b>Na_454_04449</b>        | 1.246081 | 1.742701 | 1.803117 | 1.700862 | 1.546568 | 1.397079 |
| Na_454_04449               | 1.86926  | 1.9104   | 1.887963 | 1.721979 | 1.599905 | 1.470345 |
| Na_454_04449               | 1.078133 | 1.854387 | 1.837766 | 1.840864 | 1.633009 | 1.581403 |
| Na_454_04449               | 1.77608  | 1.782298 | 1.702218 | 1.66833  | 1.529688 | 1.420868 |
| Na_454_04449               | 1.693709 | 1.848874 | 1.866318 | 1.794865 | 1.575383 | 1.46639  |
| Na_454_04449               | 1.766481 | 1.821751 | 1.85814  | 1.690427 | 1.597084 | 1.484146 |
| Na_454_04449               | 1.762473 | 1.84613  | 1.765328 | 1.766262 | 1.650526 | 1.45259  |
| Na_454_04449               | 1.606549 | 1.813    | 1.870152 | 1.783062 | 1.495597 | 1.456264 |

|                            |          |          |          |          |          |          |
|----------------------------|----------|----------|----------|----------|----------|----------|
| Na_454_04449               | 1.644556 | 1.779947 | 1.767379 | 1.712557 | 1.547611 | 1.420917 |
| Na_454_04449               | 1.436618 | 1.767129 | 1.777275 | 1.768316 | 1.527319 | 1.507    |
| <b>Average</b>             |          |          | 1.748192 |          |          | 1.592762 |
| <b>Standard Error (SE)</b> |          |          | 0.033737 |          |          | 0.023257 |

| Gene ID                    | WT-1     | WT-2     | WT-3     | WT-4     | WT-5     | WT-6     |
|----------------------------|----------|----------|----------|----------|----------|----------|
| <b>Na_454_04958</b>        | -5.92992 | -5.98532 | -6.16327 | -6.47976 | -5.66636 | -6.61115 |
| Na_454_04958               | -4.53454 | -6.14051 | -6.33988 | -6.65255 | -6.59525 | -6.46832 |
| Na_454_04958               | -5.9603  | -6.08971 | -6.13501 | -6.59885 | -6.54121 | -5.58955 |
| Na_454_04958               | -6.18422 | -6.19566 | -5.9647  | -6.70306 | -6.64636 | -6.52868 |
| Na_454_04958               | -6.17371 | -6.24626 | -6.43476 | -6.76077 | -6.67678 | -6.93135 |
| Na_454_04958               | -5.20249 | -6.27108 | -5.32962 | -6.80097 | -5.66701 | -6.99007 |
| Na_454_04958               | -6.09807 | -6.1901  | -6.35727 | -6.67453 | -6.64614 | -6.86614 |
| Na_454_04958               | -6.06954 | -6.22716 | -6.43285 | -6.73417 | -5.59318 | -6.91465 |
| Na_454_04958               | -6.0262  | -6.16676 | -5.10756 | -6.64658 | -6.57735 | -5.76091 |
| Na_454_04958               | -5.7084  | -5.80931 | -5.9656  | -6.21768 | -6.28503 | -6.40948 |
| <b>Average</b>             |          |          | -5.99839 |          |          | -6.4934  |
| <b>Standard Error (SE)</b> |          |          | 0.077378 |          |          | 0.07488  |
| <b>Na_454_05873</b>        | -0.55907 | -0.57514 | -0.55444 | 0.343231 | 0.138595 | 0.448478 |
| Na_454_05873               | -0.70822 | -0.58067 | -0.68762 | 0.390747 | 0.245512 | 0.497685 |
| Na_454_05873               | -0.59212 | -0.63992 | -0.55066 | 0.296953 | 0.183067 | 0.414904 |
| Na_454_05873               | -0.56373 | -0.63308 | -0.66127 | 0.336249 | 0.155449 | 0.462091 |
| Na_454_05873               | -0.61941 | -0.67629 | -0.64517 | 0.281197 | 0.166639 | 0.494225 |
| Na_454_05873               | -1.04249 | -0.56087 | -0.53408 | 0.298543 | 0.274148 | 0.448179 |
| Na_454_05873               | -0.54959 | -0.66971 | -0.59419 | 0.36154  | 0.179069 | 0.477935 |
| Na_454_05873               | -0.64075 | -0.62519 | -0.60755 | 0.552491 | 0.253748 | 0.573195 |
| Na_454_05873               | -6.05282 | -0.55596 | -0.56784 | 0.357767 | 0.259982 | 0.598842 |
| Na_454_05873               | -0.48432 | -0.57369 | -0.31691 | 0.505824 | 0.386079 | 0.636755 |
| <b>Average</b>             |          |          | -0.82399 |          |          | 0.351499 |
| <b>Standard Error (SE)</b> |          |          | 0.182671 |          |          | 0.025512 |
| <b>Na_454_09569</b>        | -2.69496 | -2.73586 | -2.16006 | -2.35324 | -2.39077 | -2.26006 |
| Na_454_09569               | -2.26128 | -2.69234 | -2.09054 | -2.40385 | -2.25665 | -2.13751 |
| Na_454_09569               | -2.66148 | -2.90997 | -2.08268 | -2.14412 | -2.56001 | -2.14195 |
| Na_454_09569               | -2.45578 | -2.91106 | -2.268   | -2.45072 | -2.58224 | -2.25918 |
| Na_454_09569               | -2.41165 | -2.71693 | -2.42636 | -2.53664 | -2.78758 | -2.32588 |
| Na_454_09569               | -2.44468 | -2.52393 | -2.28875 | -2.41824 | -2.54867 | -2.1034  |
| Na_454_09569               | -2.48272 | -2.91026 | -2.29332 | -2.35458 | -2.66111 | -2.30167 |
| Na_454_09569               | -2.35818 | -2.59445 | -2.20693 | -2.40897 | -2.80733 | -2.1235  |
| Na_454_09569               | -2.34725 | -2.60775 | -2.14434 | -2.68392 | -2.67038 | -2.23008 |
| Na_454_09569               | -2.45304 | -2.80569 | -2.41439 | -2.41414 | -2.77736 | -2.29004 |
| <b>Average</b>             |          |          | -2.46969 |          |          | -2.40379 |
| <b>Standard Error (SE)</b> |          |          | 0.04484  |          |          | 0.038118 |
| <b>Na_454_11346</b>        | 2.997677 | 3.004299 | 2.935074 | 2.647098 | 2.919393 | 2.608629 |
| Na_454_11346               | 2.216663 | 2.899045 | 2.961166 | 2.597582 | 3.018677 | 2.588171 |
| Na_454_11346               | 3.406286 | 3.046887 | 3.087351 | 2.731723 | 3.110659 | 2.754458 |
| Na_454_11346               | 3.318817 | 3.008265 | 3.050765 | 2.700213 | 3.149605 | 2.671003 |
| Na_454_11346               | 2.338322 | 3.00864  | 3.051606 | 2.736108 | 3.16156  | 2.633806 |
| Na_454_11346               | 3.576119 | 2.976466 | 3.069021 | 2.666917 | 3.087149 | 2.687211 |
| Na_454_11346               | 3.342209 | 3.040084 | 3.006158 | 2.725632 | 3.099126 | 2.663497 |
| Na_454_11346               | 3.227558 | 2.900011 | 2.91291  | 2.59154  | 3.062117 | 2.622083 |

|                            |          |          |          |          |          |          |
|----------------------------|----------|----------|----------|----------|----------|----------|
| Na_454_11346               | 3.294129 | 2.968948 | 3.026862 | 2.653697 | 2.968841 | 2.646048 |
| Na_454_11346               | 3.303959 | 2.909596 | 2.979078 | 2.634703 | 3.016894 | 2.621154 |
| <b>Average</b>             |          |          | 3.024864 |          |          | 2.79639  |
| <b>Standard Error (SE)</b> |          |          | 0.048411 |          |          | 0.036688 |

| Gene ID                    | WT-1     | WT-2     | WT-3     | WT-4     | WT-5     | WT-6     |
|----------------------------|----------|----------|----------|----------|----------|----------|
| <b>Na_454_11519</b>        | -5.91096 | -6.03365 | -6.24042 | -5.66932 | -6.48925 | -6.67164 |
| Na_454_11519               | -3.79626 | -6.17031 | -6.39019 | -6.69387 | -6.63883 | -6.87336 |
| Na_454_11519               | -6.13972 | -6.28    | -6.48609 | -6.81346 | -6.69943 | -6.99124 |
| Na_454_11519               | -6.10733 | -6.27286 | -6.14321 | -6.80943 | -6.3146  | -6.99772 |
| Na_454_11519               | -6.10057 | -6.2682  | -6.48302 | -6.79914 | -3.88612 | -6.98894 |
| Na_454_11519               | -5.98238 | -6.05441 | -6.21755 | -5.84675 | -6.52895 | -6.66744 |
| Na_454_11519               | -4.5775  | -6.05993 | -6.21512 | -6.49998 | -6.46622 | -6.67158 |
| Na_454_11519               | -5.94193 | -6.05961 | -6.23675 | -6.49919 | -6.49354 | -6.64308 |
| Na_454_11519               | -5.91261 | -6.0247  | -6.19734 | -6.46088 | -6.45935 | -6.60105 |
| Na_454_11519               | -5.77674 | -5.89479 | -6.05187 | -6.32279 | -6.32626 | -6.47568 |
| <b>Average</b>             |          |          | -6.01121 |          |          | -6.48794 |
| <b>Standard Error (SE)</b> |          |          | 0.096837 |          |          | 0.103944 |
| <b>Na_454_13228</b>        | 5.242868 | 5.187396 | 4.758692 | 5.435677 | 5.622139 | 5.465196 |
| Na_454_13228               | 5.251841 | 5.172171 | 4.790378 | 5.477351 | 5.618313 | 5.519076 |
| Na_454_13228               | 5.385828 | 5.210041 | 4.882698 | 5.580122 | 5.783157 | 5.552888 |
| Na_454_13228               | 5.265976 | 5.135398 | 4.832311 | 5.552288 | 5.731008 | 5.554051 |
| Na_454_13228               | 5.322724 | 5.141096 | 4.865966 | 5.542835 | 5.667053 | 5.564067 |
| Na_454_13228               | 5.429273 | 5.218694 | 4.825903 | 5.530729 | 5.685403 | 5.507787 |
| Na_454_13228               | 5.051061 | 5.177979 | 4.812734 | 5.505072 | 5.634892 | 5.571707 |
| Na_454_13228               | 4.936936 | 5.248901 | 4.942274 | 5.605877 | 5.831672 | 5.651961 |
| Na_454_13228               | 5.223774 | 5.157341 | 4.866179 | 5.489846 | 5.680121 | 5.568146 |
| Na_454_13228               | 5.045598 | 5.140184 | 4.801236 | 5.516216 | 5.648449 | 5.507706 |
| <b>Average</b>             |          |          | 5.086535 |          |          | 5.589942 |
| <b>Standard Error (SE)</b> |          |          | 0.036045 |          |          | 0.017105 |
| <b>Na_454_14052</b>        | 1.166127 | 0.756634 | 0.699658 | 0.174946 | 0.482008 | 0.13525  |
| Na_454_14052               | 1.383087 | 0.946884 | 0.812106 | 0.318267 | 0.704894 | 0.290419 |
| Na_454_14052               | 1.126198 | 0.723689 | 0.733395 | 0.257514 | 0.616226 | 0.262938 |
| Na_454_14052               | 1.222606 | 0.840878 | 0.79465  | 0.3035   | 0.578411 | 0.286124 |
| Na_454_14052               | 1.275714 | 0.755746 | 0.735708 | 0.310159 | 0.671478 | 0.302745 |
| Na_454_14052               | 1.22287  | 0.707566 | 0.792016 | 0.317872 | 0.548358 | 0.210531 |
| Na_454_14052               | 1.310527 | 0.785533 | 0.816971 | 0.362789 | 0.552736 | 0.306067 |
| Na_454_14052               | 1.262427 | 0.864672 | 0.821342 | 0.270667 | 0.597988 | 0.292351 |
| Na_454_14052               | 1.445459 | 0.924754 | 0.813499 | 0.197101 | 0.614101 | 0.007843 |
| Na_454_14052               | 1.073212 | 0.666032 | 0.655235 | 0.132519 | 0.429785 | 0.129262 |
| <b>Average</b>             |          |          | 0.95336  |          |          | 0.369381 |
| <b>Standard Error (SE)</b> |          |          | 0.043944 |          |          | 0.033272 |
| <b>Na_454_20559</b>        | 5.459991 | 5.18131  | 5.219769 | 5.613852 | 5.508891 | 5.64184  |
| Na_454_20559               | 4.995404 | 5.140774 | 5.364242 | 5.560951 | 5.412828 | 5.629524 |
| Na_454_20559               | 5.497836 | 5.291489 | 5.463633 | 5.78365  | 5.576529 | 5.804435 |
| Na_454_20559               | 5.450382 | 5.294495 | 5.445929 | 5.758096 | 5.571478 | 5.826254 |
| Na_454_20559               | 5.421386 | 5.257202 | 5.365087 | 5.751528 | 5.515007 | 5.737437 |
| Na_454_20559               | 5.349078 | 5.205595 | 5.312526 | 5.62722  | 5.477323 | 5.674453 |
| Na_454_20559               | 5.445868 | 5.213919 | 5.32684  | 5.640053 | 5.461629 | 5.664702 |
| Na_454_20559               | 5.477423 | 5.324095 | 5.496439 | 5.822252 | 5.622775 | 5.775914 |

|                            |          |          |          |          |          |          |
|----------------------------|----------|----------|----------|----------|----------|----------|
| Na_454_20559               | 5.247261 | 5.018524 | 5.153608 | 5.510977 | 5.382131 | 5.506886 |
| Na_454_20559               | 5.389252 | 5.18074  | 5.309569 | 5.651788 | 5.506736 | 5.668936 |
| <b>Average</b>             |          |          | 5.311856 |          |          | 5.624393 |
| <b>Standard Error (SE)</b> |          |          | 0.02476  |          |          | 0.022526 |

| Gene ID                    | WT-1     | WT-2     | WT-3     | WT-4     | WT-5     | WT-6     |
|----------------------------|----------|----------|----------|----------|----------|----------|
| <b>Na_454_29718</b>        | -2.01712 | -1.91554 | -1.98863 | -2.19373 | -2.02003 | -2.3127  |
| Na_454_29718               | -2.01147 | -1.91141 | -2.04179 | -1.96599 | -2.10744 | -2.05293 |
| Na_454_29718               | -2.09636 | -1.87702 | -1.82825 | -2.08144 | -2.02184 | -1.8663  |
| Na_454_29718               | -1.98012 | -1.87473 | -1.76793 | -2.04098 | -2.06073 | -2.04856 |
| Na_454_29718               | -1.76593 | -2.03127 | -2.05671 | -2.03669 | -2.13128 | -2.05982 |
| Na_454_29718               | -1.78806 | -1.85875 | -2.00739 | -2.09818 | -1.8383  | -2.16145 |
| Na_454_29718               | -2.0935  | -1.94545 | -1.78749 | -2.01187 | -1.8946  | -1.9988  |
| Na_454_29718               | -1.79572 | -1.89871 | -1.77559 | -1.82731 | -2.1495  | -1.95    |
| Na_454_29718               | -2.04509 | -2.31069 | -2.09413 | -2.06113 | -2.14344 | -1.97073 |
| Na_454_29718               | -2.98248 | -2.1434  | -2.07266 | -2.0585  | -2.17605 | -2.05451 |
| <b>Average</b>             |          |          | -1.94685 |          |          | -2.04095 |
| <b>Standard Error (SE)</b> |          |          | 0.041812 |          |          | 0.019522 |
| <b>Na_454_36014</b>        | -4.16016 | -4.39376 | -4.00275 | -4.50372 | -3.90452 | -4.77664 |
| Na_454_36014               | -4.11649 | -4.26969 | -4.21351 | -4.54552 | -4.08465 | -6.66695 |
| Na_454_36014               | -5.83947 | -4.01508 | -4.22811 | -4.12755 | -4.94371 | -6.56377 |
| Na_454_36014               | -4.32903 | -4.13961 | -4.7443  | -3.97902 | -4.27062 | -4.64266 |
| Na_454_36014               | -4.05067 | -4.28772 | -4.24122 | -4.41347 | -4.72066 | -5.30482 |
| Na_454_36014               | -4.87003 | -4.064   | -5.08805 | -3.85287 | -4.17587 | -5.1166  |
| Na_454_36014               | -4.16184 | -4.2166  | -4.09488 | -4.07305 | -4.09592 | -5.39502 |
| Na_454_36014               | -4.51573 | -4.08478 | -4.43798 | -4.28143 | -4.43134 | -4.77271 |
| Na_454_36014               | -4.70159 | -3.69352 | -5.27064 | -4.20797 | -5.19283 | -5.41014 |
| Na_454_36014               | -5.80553 | -4.2766  | -4.02116 | -4.11403 | -4.53781 | -5.90241 |
| <b>Average</b>             |          |          | -4.37893 |          |          | -4.68348 |
| <b>Standard Error (SE)</b> |          |          | 0.093046 |          |          | 0.133173 |
