# Supplementary material for: A Jasmonate ZIM-Domain Protein NaJAZd Regulates Floral Jasmonic Acid Levels and Counteracts Flower Abscission in Nicotiana attenuata Plants
Source: PubMed Central journal article supplement (PMC3585257; doi:10.1371/journal.pone.0057868), 2013-02-28
Supplement: pone.0057868.s012.pdf [file pone.0057868.s012.pdf]

**Text S1.** Nucleotide sequence alignment of *NaJAZ* genes and inverted repeat (ir) construct used for NaJAZd silencing in irJAZh plants.

**A.** Sequence alignment of NaJAZa and ir-construct of NaJAZd

```

ir-construct -----
NaJAZa      ATGGCATCATCGGAGATTGTGGATTCCGGTAAATTTCCGCCGGCGGGTTCAGAAATCA 60

ir-construct -----
NaJAZa      CATTTCACAGACATGTAATTTGTTGAGCCAATACTTGAAAGAGAAGAAAGGTTCCCTT 120

ir-construct -----
NaJAZa      GGAGATCTCAGCCTTGGTATCCACCGCGCCGGCACTACTACTATGGATTTATCCCAATG 180

ir-construct -----ACTA-- 4
NaJAZa      ATTGAGAAATCTGGTGGTGTGAGTCAAACCCTCAGAAACCAATGAATCTGTTTCCCTCAAAGT 240
                                     ***

ir-construct -CAAAATCTGAACCAGAAAAGGCACAAATGACAATATTTTATGGTGGTCAAGTTATTGTA 63
NaJAZa      ***** * ** * ***** ***** ***** ** * *****
GCAAAATCTGAATCGGAGAAAAGCACAGATGACGATATTCTACGGCGGTCAAGTTATTGTA 300

ir-construct TTTGATGATTTTCCAGCAGCTAAGGCAAATGAAATCATGAAATTGGCTAG-----CAAG 117
NaJAZa      *** ***** * ** * ** ***** ***** ***** ***
TTAATGATTTTCCGCAGATAAAGCTAAGGAAATCATGCTTATGGCTAGTTGTGCCAAA 360

ir-construct AAAACAACAACAA-----CAACAACAG--AATTGGCTACTAACATATT 161
NaJAZa      ***** ***** ***** ** * * *
GGAAACAACAACAGTACTACTCAGATTCAAAAACAGCTGAATCTG-CTTTAGATTGGT 419

ir-construct TTCTTATCCTAT-----GGTAAATAATCAAAATTCAGCTGAATCTG--TTACTACCAA 212
NaJAZa      ** * ***** ** * * * ** ** * * * *****
ACCTCAGCCTATTATTCTGAGATTTACCAATTGCGAGACGAGCTTCACTTACTAGGTT 479

ir-construct TTT-GACTCAAGAACT-----TCGTTGCGGAACCTCAC-GTGCCAAT--ATCA----- 255
NaJAZa      *** * ***** * * * * * ** * * * * * * * *
TTTAGAGAAAAGAAAAGATAGGCTGATTGCTAAAGCACCGTACCAATTAAGCAACACAAA 539

ir-construct ----CAATCATCTGTTGCTGA-----TTA-----CCGATTGCGAGA 288
NaJAZa      *** * * * * * ** ** ** * * * * *
TAAACAAGCAGCAGTTTCTGAAAACAAGGCGTGGCTTGGATTGGGTGCTCAATTTCCAGT 599

ir-construct CGAAATT---CACTTACA- 303
NaJAZa      ** * ** * *
GAAAGCTGAGCAATTCTAG 618

```

**B.** Sequence alignment of NaJAZb and ir-construct of NaJAZd

```

ir-construct -----ACTACAA-----AATCTGAACCAGAA 21
NaJAZb      ATGGATTCAAGTATTATTGAGATAGATTTTCATGGACCTCAACAGCAGACCTCAATCAGAA 60
                                     ** ** * ** * *

```

```

ir-construct      AAGGC-----ACAAA-----TGACAATATTT---TATGG----- 47
* ** *          *****          * * * * *          *****
NaJAZb           ATGGCGAAGCAACAAACCAAAGCTTCTGGGATGAAGTGGCCATTTTCATCTATGGCTAAC 120

ir-construct      -----TGGTCAAGTT-----ATTGTATTTGA-----TGAT---TTTCC 77
*   ***** *          * * * * *          * *          * * *****
NaJAZb           TTAGTACTCAAGCTGAAAGCAGATTTTTTCAGAATTACAACCTCCTCCCAATAGTTTCC 180

ir-construct      AGCAG-----CTAAGG-----CAAATGAAATCATGAAA 105
* * *          * * * *          * * * * *          * * * * *
NaJAZb           AGTAATTCAAAAAGTTCACCCCTAAAGAGCTACAAACTCACCACAAAAGATTCCAGGAAA 240

ir-construct      ----TTGGCTAGCAAGAAAAAC-----AACAACAAC----- 132
* * * *          * * * *          * * *          * *
NaJAZb           AATTCTGACCATTTGAGGAAACCTGAGTCAACGTTGACCATATTCTACATGGGTGAGGTC 300

ir-construct      -----AACAAACA--GAATTTGGCTACTAA- 155
* * * * *          * * * * *          * * * * *          * * * * *
NaJAZb           CATATTTTTTCAGGATATCACACCAGAAAAGGCTGAACTAATAATGGACTTGGCTTCTAAA 360

ir-construct      ----CATATTTTCTTATC-CT-----ATGGTAAATAATCAAATTC-----A 192
* * * * *          * * * *          * * * * *          * * * * *          *
NaJAZb           TCAACGAATCTCCACATGACTGAGATTTTAGAAAAGGCAAATAAAGAAAAATATGAAGAA 420

ir-construct      GCTGAATCTG----T TACTACCAATTTGACTCAAGAACTTCGTT-----CGCGAACT 240
* *****          * * ***** * * * * *          * * * * *          * * * *
NaJAZb           AATAAATCTGAGCCTTCAACACCAAATGCATCCACAATTATGCTAAAGGAGCACTGGCT 480

ir-construct      ----CACGTG-----CCAAT-----ATCACA 257
* * *          * * *          * * * * *
NaJAZb           ATGGCTCGTAGAGCAACCCTTGCCCGATTTTTGGAGAAGAGAAAGCATAGATTGATCACA 540

ir-construct      ATCATCTGTTGCTGATTT-----ACCGA-----TTG-----CGAGAC 289
*   * * * *          * * *          * * *          * * *
NaJAZb           GCTAGGCCATACCAATATGGTGAAAAAACACCAAAGTTTCTTTTGAAATGCACCAAGAA 600

ir-construct      GAAA-----T TCACTTACA----- 303
* * *          * * * *          *
NaJAZb           GAAGAAACGGCGTCGTCGAAGCGTTCATTGGGAAAGCTAA 639

```

### C. Sequence alignment of NaJAZc.1 and ir-construct of NaJAZd

```

ir-construct      -----
NaJAZc.1         ATGGAGAGAGATTTTATGGGACTGAATTCTAAAGATCTGTTGTTTTGGTTAAGGAAGAA 60

ir-construct      -----
NaJAZc.1         CCTGTTGAAACCTGCAAAGACTCTGGGTTTCGCTGGCCGTTGTCGAGCAAGGTGGGTATA 120

ir-construct      -----
NaJAZc.1         CCTCATTTTCATGTCTTTGAACTCTGCTCAAGATGAAAAACCATTCAAAGCTCAATCCGCT 180

ir-construct      -----
NaJAZc.1         GCAGATGGAGTTGACAGTTGTCTCAAACGCCAGTCTGGTGAAATCCAGAATGTGCATGCA 240

ir-construct      -----
NaJAZc.1         ATGCATCTTCTCCATGATGTTATGATGCTTCCGTTTAAACAGGAGCAATCCCTCCTACAAG 300

```



```

NaJAZe          CCTCTCTTTCAAGGGTGCTCAAGAGGATAGGCTGAAAAGCTGGTTTGTATTCACTTGCATC 179

ir-construct    AGCTAA---GGCAAATGAAATCA----TGAAATTG-----GCTAGCAA----- 116
* * *           * * * * * * * * * * * * * * * * * * * * * *
NaJAZe          AACTGGATTGGTGACTATAACCACAACGAAGCTGTCGACTCAAGTCATCGACCGTACTC 239

ir-construct    -----GAAAAACAA-----CAAC 129
* * * * * * * * * * * * * * * * * * * * * *
NaJAZe          TGGTGTACACAGAAATAATATGATGCTTGAAGCAAGGTGGAACGCACTACACGTCGAC 299

ir-construct    AAC----- 132
* * *
NaJAZe          AACTTTCTCTCCTCATCACTATGATGCTCACTCCGTGCATCGATCTCATGGAGTCAGAGT 359

ir-construct    -----AACAAA-CAGAATT-----TGGCTA---CTAA-CATA- 159
* * * * * * * * * * * * * * * * * * * * * *
NaJAZe          GCTCCCAGTTTCCAACCTAGCAAATCAGATTTCTGTATCTATGACTATGCCTGGTCATAA 419

ir-construct    ----TTTCTTATCCTATGGTAAATAATCAA-----AATTCAGCTG---AAT 199
* * * * * * * * * * * * * * * * * * * * * *
NaJAZe          GTCCTTTGTTTCTCCTCTTGGACAGAATCCAGTTGCTAGCCCCATTTTCAGCTGTCCAAC 479

ir-construct    -----CTGTT-----ACTACCAATTTGA-----CTCAAGAACTTC----- 229
* * * * * * * * * * * * * * * * * * * * * *
NaJAZe          TAACAGCGCTGTCGTGGGCACAACCTGATTTAAGGGGTGCTCCGAAAACCTCCCCAGGTCC 539

ir-construct    -----GTTTCGCG----- 236
* * * *
NaJAZe          TGCTCAGTTGACCATCTTTTATGGTGGTTCCTGCTGTGTTTATGATAATGTTTCGCCAGA 599

ir-construct    ----- 659
NaJAZe          GAAGGCTCAAGCTATTATGTTGCTTGCTGGAAATGCACCACCTGTTACACCAAGTGCAAC

ir-construct    -----AACTCACGTGCCAATATCACAATCATCTGTTGCTGA----TTTAC 277
* * * * * * * * * * * * * * * * * * * * * *
NaJAZe          ATCTACTCTATCTCCAGTTCAGGCGCTATACCCAAGTCTCTTCTGTTGACTCTTTTGT 719

ir-construct    CG-----A 280
* *
NaJAZe          TGTAATCAGTCCCACAACACAACCTACTCTTCCCAGCCCCATTTCTATAACATCTCA 779

ir-construct    TTGCAGACGAAATCACT-----TACA----- 303
* * * * * * * * * * * * * * * * * * * * * *
NaJAZe          TTGTGGATCTCAATCTGCTGGAGTGTCTAGTAATACAAATGGAGTAACTATTATCAAATC 839

ir-construct    ----- 899
NaJAZe          AACTGGGGTCTACCATCTCCTTCAATAAAGCAGGACTTTCCAAATTTCCAGTTCCAT

ir-construct    ----- 959
NaJAZe          AGGATCTGTTCCCTGCCACCTTTGTTCCATCAGCTGTACCGCAGGCACGCAAGGCATCATT

ir-construct    ----- 1019
NaJAZe          GGCTCGGTTCTTGAGAAGCGCAAAGAAAGGGTAATAAGTGCATCACCTTACGACACCAG

ir-construct    ----- 1079
NaJAZe          CAAGCAATCCCCAGAATGTAGCACTCTTGATATGGAAGCAGAAGTTTCGCTAAATATTC

ir-construct    ----- 1128
NaJAZe          TTTAGGCTCTTGTCTCCCAAGTAATCAATTTGGTCAAGGAGACGTGA

```

## E. Sequence alignment of NaJAZf and ir-construct of NaJAZd

```

ir-construct      ---ACTACAAAATCTGAACCAGAA--AAGGCACAAATGACAATAT-TTTATGGTGGTC-- 52
                  * * *** * * *      *** *****      * * * *** * * **
NaJAZf           ATGAGAAGAAACTGTAACCTTGGAACTAAGGCTTGTCCTCCTTGTTCTGTTTCTCCT 60

ir-construct      -AAGTTATTGTATTTGATGATTTTCCAGCAGCTAAGGCAAATGAAATCATGAAATTGGCT 111
                  *** ***** * * * **      *      **      ** * * * * * ***
NaJAZf           AAAG--ATTGCACT--ACGACCCCTTA----CTTCTCCATGAGGGATAACCAG---GGCA 109

ir-construct      AGCAAGAAAAACAACAACAACAACAACAAGAATTTGGCTACTAACATATT-----TTCTT 166
                  **** * * **** * * * * * **** * * * * * * * * * ****
NaJAZf           CAGAAGAGAAGCAACAGCAGCAGCTAACAATATTCTACAATGGAAAAGTTGTGGTTTCTG 169

ir-construct      ATCCTATGGTA-----AATAAT-----CAA-----AATTCAGCTGA 197
                  ** ** *      *****      ***      ** * * **
NaJAZf           ATGCTACAGAGCTTTCAGGCGAAAGCAATAATATATCTCGCAAGTAGAGAAACGGAGGAGA 229

ir-construct      ATCTG-----TTACTACCAATTT--GACTCAAGAACTTCGTT--CGCGAACTCAG--- 244
                  **      * * ***** * * * * * * * * * * * * * * *
NaJAZf           ATACAAAGACTTCATCACCAATTTCAGAATCATCATCACCATTGTACAAACTCAAACCTG 289

ir-construct      ---TGCCAATATCACAATCATCTGTGCTGATTTACCGATTGCGAGACGA---AATTCA- 297
                  * * * *      **** * * *      * * * * * * * * * * *
NaJAZf           GTCTTTCCATGAAGAAATC-TCTGCAAAGATTTCTGCAAAGAGAAAAAATAGAATTCAA 348

ir-construct      ----CTT----ACA----- 303
                  ***      * *
NaJAZf           GAAACTTCTCCATATCATCACTAG 372

```

## F. Sequence alignment of NaJAZg and ir-construct of NaJAZd

```

ir-construct      -----ACTACAAAAT-----CTGAA----- 15
                  * * ****      *****
NaJAZg           ATGGAGAGAGATTTTCATGGGGTTGGCTGTAAAACAAGAAATACCTGAAGAACAGCCCACA 60

ir-construct      ---CCAGAAAAGGCACAAAT---GACAATATT-----TTAT----- 45
                  **** * * * *      *** * * *****      * **
NaJAZg           GATCCAGCAATGGCCAGAATTTTCGGCTATATTGCAGAGGTCATTTCTTAACAAGGCTCTT 120

ir-construct      -----GGTGGTCAAG-----TT-----ATTGTATTTGATGAT 72
                  * * *****      *      * * * ***** *
NaJAZg           CCTCAATACCTTTCTTTCAAAAATGCTCAAGGGAATACTCCTAAGACTGGTTTTGATTCT 180

ir-construct      TTTCCAGCAGCTAA---GGCAAATG-----AAATCATGAA-----AT 106
                  ** * * *****      ** * *      ** *****      **
NaJAZg           CTTGCATCAGCTGGATTGGTTACTATAACCACAAGTCATGAAGCTGTTGACTCGAATTAT 240

ir-construct      TGGCTA-----GCAA-----GAAAAACA----- 125
                  * * *      * **      ***** **
NaJAZg           CGACCATACACTGCTGTAACACAGAAAAATTTGATGCTTGAAAAGCAAGGGATAACGAAC 300

ir-construct      ----CAACAACAAC-----AACAGAATTTG----- 147
                  *** *****      * * * * *
NaJAZg           TATACAATGACAACCTACCCTCCACATAAAATTTGGTACAAATTCAGTTCAGCAATCTCAT 360

ir-construct      -----GCTACTAA-----CATATTTCTTATCC----- 170

```

```

                * * ****                ** ****        ****
NaJAZg          GAAGTCAGAGTACTCCCAGTTGCTAATCAAACACATCAGATTTCTGTATCTACGAGAAAT 420

ir-construct    ---TATGGT-----AAAT-----AAT 183
                *****                ***                ***
NaJAZg          ATGCATGGTCGTCAGCCCTTAATTTCTCCTGCTGGACAGAATTTGATTTCTATAATAAAT 480

ir-construct    CAAAATTCAGCTGAA-----TCTGTT----- 204
                ***** * *** *                ** **
NaJAZg          CAAAATCCTGCTAGAGGTGCCCAAATATCAAGCTCCATTTCCATTCTTCCTAATCGCAAT 540

ir-construct    -----ACTACCAATTTGA-----CTCAAGA-----ACTTCG 230
                ***** * ****                * *****                ** *
NaJAZg          GGAGTGGTGGGCACTACTGAATTGAGGGGTGCTCCCAAGACTTCAGCAGGACCTGCTCAG 600

ir-construct    TTCGCGAACTCAGTGC-----CAATAT----- 253
                * * * * *                *****
NaJAZg          CTGACCATCTTTTATGCTGGTTCAGTCAGTGTTCAGACAATATTCTCCAGAGAAGGCT 660

ir-construct    -----CACAAATCATCTG-----TT 267
                ***** * * *
NaJAZg          CAAGCTATCATGTTACTTGTGCGCAATGCACAACCAGCTGGTATTCCAAGTACAACATCT 720

ir-construct    GCTGATTTACCGATTGCGAGA----CGAAATTCACTT-----AC 302
                *** * ** * **** * **** *
NaJAZg          ACTGCATCTCCAGTTCAGAGAATTCCTAAATCTTCTCTGTTGATGCTTTTGTGGAAAC 780

ir-construct    A----- 303
                *
NaJAZg          AAATGCCATAGAACTACATCGCCTAGTTTTTCCAGTCCCATTCTATAACCACACACGGC 840

ir-construct    ----- 900
NaJAZg          GCCTCTCAATCTATTGGAGTGTCTAATAATACGAATCAAATAACTATGAGTATCAGGTCA

ir-construct    ----- 960
NaJAZg          ATCGGAGTCTGACTAATTCTCCCTCTAACAAAACGGAGCCATCTAAAGTCGTCCGTTCT

ir-construct    ----- 1020
NaJAZg          CAGGAATCTCATCCTCCTAGCCATACATTATCAGCTGTACCTCAGGCTCGCAAAGCATCC

ir-construct    ----- 1080
NaJAZg          TTGGCTCGGTTCTTGGAGAAGCGCAAGGAAAGGATACTGAGTGCATCACCATACGACAAT

ir-construct    ----- 1140
NaJAZg          AGCAAGCAAAGTTCACAATATAGTACACCTGGATCTAGCAGCTGGAGCTTCTTTGTTAAC

ir-construct    ----- 1179
NaJAZg          TCTTCAGGATCCAGTACTGTTCTTCTGCTACTATATAG

```

**G. Sequence alignment of NaJAZh and ir-construct of NaJAZd**

```

ir-construct    ----- 60
NaJAZh          ATGTCAAATTCGCAAAATTTCTTTTGACGGCGGCAGAAGGGCCGAAAAGCGCCGGAGAGA

ir-construct    -----

```

```

NaJAZh          TCGAATTTTCGTGCAGACTTGTAATTTATTGAGTCAGTTTATTAAGGAAAAGCTACTATT 120

ir-construct
NaJAZh          -----
AGAGATCTGAATCTCGGAATTGCTGGAAAATCTGAAATCTCAGGTAAAAGTGATGTTACA 180

ir-construct
NaJAZh          -----
GAAGCTGCAACTATGGATTTATTGACAATTATGGAAAACCCCTCAATTGAAACTAAAGAA 240

ir-construct
NaJAZh          -----ACT---ACAAAATCT----- 12
                    **   **   **   **
NaJAZh          CAAGAACAAAAATCCATAGATCCCGTTCGTCAGAGTGCTGTAACAGAATCTTCTAGAGAT 300

ir-construct
NaJAZh          -----GAACCAGAAAAG----- 24
                    *   **   *   **
NaJAZh          ATGGAGGTGGCCGTAAATGAGCCCAGCAGCAGCAAAGAGGCACCAAAAAGAGCCTAAGGCA 360

ir-construct
NaJAZh          GCACAAATGACAATATTTTATGGTGGTCAAGTTATGTATTTGATGATTTTCCAGCAGCT 84
                    ***** ** * * ** * ** * ** * * ***** *
NaJAZh          GCACAATTGACTATGTTCTATGATGGTAAAGTGATAGTATTTGATGATTTTCCAGCTGAC 420

ir-construct
NaJAZh          AAGGCAAATGAAATCATGAAATTGGCTAGCAAGAAA-----AACAA-- 124
                    ** * * * * * * * * * * * * * * * * * * * *
NaJAZh          AAAGCTAGAGCAGTAATGTTATTGGCTAGTAAAGGATGCCCTCAGAGTTCATTTGGCACT 480

ir-construct
NaJAZh          -----ACAACAACAACAACAGAAATTTG-----GCTACTA----- 154
                    ** ***** *   **   **   *****
NaJAZh          TTTCATACTACAACCATCGACAAAATTAACACATCTGCTACTGCTGCTGCCACAGCTTCT 540

ir-construct
NaJAZh          ---ACATAT-----TTTCT----- 165
                    **** *   *****
NaJAZh          TTGACATGTAATAAAACTAATCAGCTTAAACCAAGTACAGTTTCTATTGCACCACCACAA 600

ir-construct
NaJAZh          -----TATCCTATGGTAAA--TAATCAA----- 186
                    * * * * * * * * * * * * * * *
NaJAZh          CAAAAGCAGCAGCAAATTCATGTTTCTTATAGTAAAAGTGACCAACTCAAGCCAGGGTAT 660

ir-construct
NaJAZh          AATTCAGCTG-----AATCTGT-----TACTACCAAT--- 213
                    ***** **   * * * * * * * * * *
NaJAZh          AATTCGCTACGCCGAAGTACTGCAGCAGCAGCTAGTCCATGTTTCTAGTACTAGTAAA 720

ir-construct
NaJAZh          -----TTGACTCAAG-----AACTTCGTTGCGG-----AACT-CACGTGC----- 247
                    *   ** * * *   ***** *   **   *** * * * *
NaJAZh          ACTGATCAGCTTAAGCCAGTATCAACTTCTTCTGCGTCGAAAAACAGCAGGAGCAACAT 780

ir-construct
NaJAZh          CAATA-----TCACAATCATCTG---TTGC-----TGATTTACCGATTGCGAGACGA 291
                    * *   ***** * * * * * * * * * * * * * *
NaJAZh          CAGCAAACGCAGTCACAGACACCTGGAAGTAGCAGCTCTGAGCTACCTATTGCAAGAAGA 840

ir-construct
NaJAZh          AATTCACT----- 299
                    *****
NaJAZh          TCATCACTACATAGGTTTCTTGAGAAGAGGAAAGATAGGGCAACGGCTAGAGCGCCATAC 900

ir-construct
NaJAZh          -----TACA----- 303
                    ****
NaJAZh          CAAGTTGTACATAATAATCCGTTACCATCATCTTCAAATAATAATGGGAATCATCTTCC 960

ir-construct
NaJAZh          -----
AAGGATTGCGAAGATCAACTCGATCTCAATTTCAAGTTATAG 1002

```





```

NaJAZk.1      GATGCAACTCCCAATCTGGTTGCTGCTATTGATAAATCAGCTCCTTCTAGAACAATAGGT 420

ir-construct  -TGGTAAATA-ATCA-----AAATT-----CAGC-----TGAAT----- 199
              ***  ***  ***          ***          ***          ****
NaJAZk.1      TCAGTAGATACATCAGCAGGACAAATGACAATCTTCTACAGCGGCAAGGTGAATGTCTAT 480

ir-construct  -----CTGTT-----ACTACCAAT-----TTGACTCAAGAAC--TTCGT 231
              *** *          ** * ***          ***  ***** *  ** **
NaJAZk.1      GATGATGTGCCTGCTGACAAGGCACAAACAATCATGCGTGTGCTTCAAGCTCCCTTTGT 540

ir-construct  TCGC-----GAACTC----ACGTGCCAATATCACAA-TCATCTGT-----TGCTGATTT 275
              **          *****          *** * * * * *  *** * *  ***** **
NaJAZk.1      GTGCCTTCAGAAACTCCATTGAATGCTACTGTAGCAGCTCAACATTCACATGCTG-CTT 599

ir-construct  ACCGATTGCGAG-----ACG---AAATTC-----ACTT----- 300
              * *  *** *          ***  *  ***          ***
NaJAZk.1      ACAGGTTGCAAATACTAAACTACGCCAGATTCTGATATGGTACTTCTGCCGACTATTCA 659

ir-construct  -ACA----- 303
              ***
NaJAZk.1      AACAGAAGCAGTAGAGAACCCTCAAGCAGGAAAGCATCAGTACAACGATATCTTGAGAA 719

ir-construct  -----
NaJAZk.1      GCGAAAAGACAGGTGA 735

```

## J. Sequence alignment of NaJAZI and ir-construct of NaJAZd

```

ir-construct  -----ACTACAAAATCTGA----- 14
              * *  *** * * *
NaJAZI      ATGTATTGCAGCTCCAAAGTGGCAAATAATTTCTTGAAGATTGAAAAGTTTAATAAAAAAC 60

ir-construct  ----ACCAGAAAAGGCACA--AATGACAATATTTTA-----TGGTGGT 51
              * *  * *  *** *  ***** *  *  ***          ***** **
NaJAZI      TTCGATTATCAGAAGCAAATTAATGAAAGCAACTTAAAAGGTATAGGTAACAATGGTAGT 120

ir-construct  CA-----AGTTATTGTATT----TGATGATTTT-CCAG-----CAG 82
              **          * *  * *  *          **  ***** *****          ***
NaJAZI      CACAGAAGAATGTCTGCTCTAGAGCTGGCAATTTTACCAGGAATCAAGCATGATACTCAG 180

ir-construct  CT-----AAGGCAAATG---AAATCATGA-AATTGGCTA-----GCAAGA 118
              **          ***  * *  *          ***** * *  * *  *          * *  *
NaJAZI      CTTCTGTTTTTACAAAGAGAGAAGTCTGAATCAGAACAGTTAACTATATTCTATGCTGGG 240

ir-construct  A--AAACA-----ACAACAAC-----AACAAACA-----GAATTTGGCT 150
              *          ***          *  *****          ** *  **          *  ***** **
NaJAZI      ATTGTACATGTTTATGACAATCTTCTGTTGAAAAGGCACAGTCTATTATGGATTTTGCA 300

ir-construct  ACTAACA-----TATTTTCTTATCCTA----TGGTAAAT----- 180
              * *  *          *  *****  *  ***          **  *****
NaJAZI      CGTGAAAAGTTTCAATGTTTTCTGGTTCTACTAATGTAAAATTTCCCCCAAAGAAGCTGAA 360

ir-construct  ---AATCAAAATTC---AGCTGAATCTG-----TT-----ACTACCAATT--- 214
              ***** * *  *          * *  * *  *          **          *** *****
NaJAZI      CCAAATCAGAAATCCCAAGTTCCATTTGCGTGCAAGTTCCAAGCAGAAGTCCCAATTGCC 420

ir-construct  -----TGAICTCAAGAACTTCGTTGCGGAACTCACGTGCCAATATCACAA----- 258
              *  *  *  *****  *** ***** ***          *  *  *  *  *  *
NaJAZI      AGAAGGAAATCCCTGAAGAGATTCTCGAGAAACGCCATAACAGGATTATAAGTAAACA 479

```

```

ir-construct      -----TCATCTGTGCTGATTAC-----CGATTGC-----GAGACGAAA 293
                  **  * * * * *  *  *  * *          * * * *          * * * *
NaJAZ1            CCCTTATGCCTCTCCTGTTATTACTCAACATGAAGATGAATGTAATGATCAGAGTGGAAA 539
ir-construct      TT-CACTT-----ACA----- 303
                  **  * * * *          *  *
NaJAZ1            TTATAGTTTGAAGGAAAAGAATAGTTAA 567

```

### K. Sequence alignment of NaJAZm and ir-construct of NaJAZd

```

ir-construct      ACTACAAAATCTGAACCAGAAAAGGCACAAATGACAATATTTTATGGTGGTCAAGTTATT 60
                  *  * *          * * * * *  * *          *  * * * * *  * * * *
NaJAZm            ---ATGAAGCA-----CAGAATTGGCCTTCAACTTTTCCTCTATGTGCGTC---TTCTT 49

ir-construct      GTATTTGATGATTTTCCAGCAGCTAAGGCAAATGAAATCATGA---AATTGGCTAGCAAG 117
                  *  * * *  * *          * * * *          * * *          *  * * * * *
NaJAZm            CTTCCTCAGAGTCCACAGTAGT-----GATCACTCTGTGGCCTGCTCGTCTA-CAAG 101

ir-construct      AAAA-----ACAA----CAACAACA-ACAAAC---AGAATTTGGC-TA-CTAACATAT- 160
                  * * *          * * * * *  * * * * *  * * * * *  * * * * *
NaJAZm            AAAGCATATCACAATTTTCTACAACGCACAAGCTGGAGAATGTGATATATCTGAAGTGCA 161

ir-construct      ----TTTCTTATCCTATGGTA-----AATAATCAAATTCAGC--TGAATCTGTACTAC 209
                  * *          * * * * * *  * *          * * * * * *  * *
NaJAZm            GGCCTTAGCCATCTTATGGCATGCAAGACAAGTAAAATATAATAATGGG-CTGTCCCTGA 220

ir-construct      CAATTTGACTCAAGAACTTCGTTTCGCGAACTCACGTGCCAATATCACAATCATCTGTTGC 269
                  * *  * * * *  * * * *  * * * *  * *          * * * *  * *
NaJAZm            GAAAATCCCTACAGAGGTT--TCTGCAAAG-AGAAGAGAAAGGAGGATTCAA--GCAGC 275

ir-construct      TGATTTACCGATTGCGAGACGAAATTCACCTTACA 303
                  * * *  *          * * * *
NaJAZm            TAATCCA-----TACTAG----- 288

```
